# Supplementary material
Source: PubMed Central journal article supplement (PMC5728992)

# checkCIF/PLATON report

Structure factors have been supplied for datablock(s) agada, xsc1678\_0m

THIS REPORT IS FOR GUIDANCE ONLY. IF USED AS PART OF A REVIEW PROCEDURE FOR PUBLICATION, IT SHOULD NOT REPLACE THE EXPERTISE OF AN EXPERIENCED CRYSTALLOGRAPHIC REFEREE.

No syntax errors found.      CIF dictionary      Interpreting this report

## Datablock: xsc1678\_0m

---

|                 |                                                  |                                             |
|-----------------|--------------------------------------------------|---------------------------------------------|
| Bond precision: | C-C = 0.0129 A                                   | Wavelength=0.71073                          |
| Cell:           | a=19.2289(7)      b=18.6472(6)      c=23.2634(8) | alpha=90      beta=112.739(1)      gamma=90 |
| Temperature:    | 273 K                                            |                                             |
|                 | Calculated                                       | Reported                                    |
| Volume          | 7693.1(5)                                        | 7693.1(5)                                   |
| Space group     | P 21/n                                           | P 1 21/n 1                                  |
| Hall group      | -P 2yn                                           | -P 2yn                                      |
| Moiety formula  | C34 H38 Ag N10, C F3 O3 S                        | C34 H38 Ag N10, C F3 O3 S                   |
| Sum formula     | C35 H38 Ag F3 N10 O3 S                           | C35 H38 Ag F3 N10 O3 S                      |
| Mr              | 843.68                                           | 843.68                                      |
| Dx,g cm-3       | 1.457                                            | 1.457                                       |
| Z               | 8                                                | 8                                           |
| Mu (mm-1)       | 0.641                                            | 0.641                                       |
| F000            | 3456.0                                           | 3456.0                                      |
| F000'           | 3451.20                                          |                                             |
| h,k,lmax        | 22,22,27                                         | 22,20,27                                    |
| Nref            | 13575                                            | 12764                                       |
| Tmin,Tmax       | 0.926,0.950                                      | 0.666,0.745                                 |
| Tmin'           | 0.908                                            |                                             |

Correction method= # Reported T Limits: Tmin=0.666 Tmax=0.745  
AbsCorr = MULTI-SCAN

Data completeness= 0.940      Theta(max)= 25.018

R(reflections)= 0.0902( 9788)      wR2(reflections)= 0.2878( 12764)

S = 1.037      Npar= 925

---

The following ALERTS were generated. Each ALERT has the format  
**test-name\_ALERT\_alert-type\_alert-level.**  
Click on the hyperlinks for more details of the test.

---

**Alert level B**

|                   |                                     |                  |    |       |      |
|-------------------|-------------------------------------|------------------|----|-------|------|
| PLAT029_ALERT_3_B | _diffn_measured_fraction_theta_full | value Low        | .  | 0.940 | Note |
| PLAT910_ALERT_3_B | Missing # of FCF Reflection(s)      | Below Theta(Min) |    | 11    | Note |
| PLAT972_ALERT_2_B | Check Calcd Residual Density        | 0.15A From       | 05 | -3.03 | eA-3 |

---

**Alert level C**

|                   |                                                |       |                         |      |        |
|-------------------|------------------------------------------------|-------|-------------------------|------|--------|
| PLAT084_ALERT_3_C | High wR2 Value (i.e. > 0.25)                   | ..... |                         | 0.29 | Report |
| PLAT220_ALERT_2_C | Non-Solvent Resd 1                             | N     | Ueq(max)/Ueq(min) Range | 3.1  | Ratio  |
| PLAT220_ALERT_2_C | Non-Solvent Resd 2                             | C     | Ueq(max)/Ueq(min) Range | 4.0  | Ratio  |
| PLAT220_ALERT_2_C | Non-Solvent Resd 2                             | N     | Ueq(max)/Ueq(min) Range | 3.3  | Ratio  |
| PLAT230_ALERT_2_C | Hirshfeld Test Diff for                        | N0AA  | -- C14 ..               | 5.1  | s.u.   |
| PLAT230_ALERT_2_C | Hirshfeld Test Diff for                        | N0AA  | -- C15 ..               | 5.4  | s.u.   |
| PLAT230_ALERT_2_C | Hirshfeld Test Diff for                        | N6    | -- C45 ..               | 6.5  | s.u.   |
| PLAT230_ALERT_2_C | Hirshfeld Test Diff for                        | N10   | -- C50 ..               | 6.6  | s.u.   |
| PLAT230_ALERT_2_C | Hirshfeld Test Diff for                        | N11   | -- C48 ..               | 5.1  | s.u.   |
| PLAT231_ALERT_4_C | Hirshfeld Test (Solvent)                       | S1    | -- O1 ..                | 6.1  | s.u.   |
| PLAT234_ALERT_4_C | Large Hirshfeld Difference                     | N5AA  | -- C31 ..               | 0.19 | Ang.   |
| PLAT234_ALERT_4_C | Large Hirshfeld Difference                     | N4AA  | -- C30 ..               | 0.19 | Ang.   |
| PLAT234_ALERT_4_C | Large Hirshfeld Difference                     | N2AA  | -- C13 ..               | 0.21 | Ang.   |
| PLAT234_ALERT_4_C | Large Hirshfeld Difference                     | N2AA  | -- C14 ..               | 0.16 | Ang.   |
| PLAT234_ALERT_4_C | Large Hirshfeld Difference                     | N2AA  | -- C16 ..               | 0.18 | Ang.   |
| PLAT234_ALERT_4_C | Large Hirshfeld Difference                     | N3AA  | -- C30 ..               | 0.17 | Ang.   |
| PLAT234_ALERT_4_C | Large Hirshfeld Difference                     | N1AA  | -- C12 ..               | 0.17 | Ang.   |
| PLAT234_ALERT_4_C | Large Hirshfeld Difference                     | N1AA  | -- C13 ..               | 0.20 | Ang.   |
| PLAT234_ALERT_4_C | Large Hirshfeld Difference                     | N9    | -- C46 ..               | 0.21 | Ang.   |
| PLAT234_ALERT_4_C | Large Hirshfeld Difference                     | N9    | -- C47 ..               | 0.16 | Ang.   |
| PLAT234_ALERT_4_C | Large Hirshfeld Difference                     | N9    | -- C51 ..               | 0.21 | Ang.   |
| PLAT234_ALERT_4_C | Large Hirshfeld Difference                     | N10   | -- C48 ..               | 0.19 | Ang.   |
| PLAT234_ALERT_4_C | Large Hirshfeld Difference                     | N11   | -- C49 ..               | 0.20 | Ang.   |
| PLAT234_ALERT_4_C | Large Hirshfeld Difference                     | N11   | -- C51 ..               | 0.17 | Ang.   |
| PLAT234_ALERT_4_C | Large Hirshfeld Difference                     | N12   | -- C65 ..               | 0.21 | Ang.   |
| PLAT234_ALERT_4_C | Large Hirshfeld Difference                     | N12   | -- C66 ..               | 0.18 | Ang.   |
| PLAT234_ALERT_4_C | Large Hirshfeld Difference                     | N14   | -- C67 ..               | 0.18 | Ang.   |
| PLAT234_ALERT_4_C | Large Hirshfeld Difference                     | S1    | -- O3 ..                | 0.21 | Ang.   |
| PLAT234_ALERT_4_C | Large Hirshfeld Difference                     | S1    | -- C69 ..               | 0.16 | Ang.   |
| PLAT234_ALERT_4_C | Large Hirshfeld Difference                     | F4    | -- C70 ..               | 0.20 | Ang.   |
| PLAT241_ALERT_2_C | High 'MainMol' Ueq as Compared to Neighbors of | N5AA  | Check                   |      |        |
| PLAT241_ALERT_2_C | High 'MainMol' Ueq as Compared to Neighbors of | N4AA  | Check                   |      |        |
| PLAT241_ALERT_2_C | High 'MainMol' Ueq as Compared to Neighbors of | N3AA  | Check                   |      |        |
| PLAT241_ALERT_2_C | High 'MainMol' Ueq as Compared to Neighbors of | N0AA  | Check                   |      |        |
| PLAT241_ALERT_2_C | High 'MainMol' Ueq as Compared to Neighbors of | C12   | Check                   |      |        |
| PLAT241_ALERT_2_C | High 'MainMol' Ueq as Compared to Neighbors of | C16   | Check                   |      |        |
| PLAT241_ALERT_2_C | High 'MainMol' Ueq as Compared to Neighbors of | N9    | Check                   |      |        |
| PLAT241_ALERT_2_C | High 'MainMol' Ueq as Compared to Neighbors of | N10   | Check                   |      |        |
| PLAT241_ALERT_2_C | High 'MainMol' Ueq as Compared to Neighbors of | N11   | Check                   |      |        |
| PLAT241_ALERT_2_C | High 'MainMol' Ueq as Compared to Neighbors of | C63   | Check                   |      |        |
| PLAT241_ALERT_2_C | High 'MainMol' Ueq as Compared to Neighbors of | C64   | Check                   |      |        |
| PLAT241_ALERT_2_C | High 'MainMol' Ueq as Compared to Neighbors of | C66   | Check                   |      |        |
| PLAT241_ALERT_2_C | High 'MainMol' Ueq as Compared to Neighbors of | C67   | Check                   |      |        |
| PLAT242_ALERT_2_C | Low 'MainMol' Ueq as Compared to Neighbors of  | C11   | Check                   |      |        |
| PLAT242_ALERT_2_C | Low 'MainMol' Ueq as Compared to Neighbors of  | C17   | Check                   |      |        |
| PLAT242_ALERT_2_C | Low 'MainMol' Ueq as Compared to Neighbors of  | C31   | Check                   |      |        |
| PLAT242_ALERT_2_C | Low 'MainMol' Ueq as Compared to Neighbors of  | N6    | Check                   |      |        |
| PLAT242_ALERT_2_C | Low 'MainMol' Ueq as Compared to Neighbors of  | C46   | Check                   |      |        |
| PLAT242_ALERT_2_C | Low 'MainMol' Ueq as Compared to Neighbors of  | C47   | Check                   |      |        |
| PLAT242_ALERT_2_C | Low 'MainMol' Ueq as Compared to Neighbors of  | C49   | Check                   |      |        |
| PLAT242_ALERT_2_C | Low 'MainMol' Ueq as Compared to Neighbors of  | C50   | Check                   |      |        |
| PLAT242_ALERT_2_C | Low 'MainMol' Ueq as Compared to Neighbors of  | C62   | Check                   |      |        |
| PLAT242_ALERT_2_C | Low 'MainMol' Ueq as Compared to Neighbors of  | C65   | Check                   |      |        |
| PLAT244_ALERT_4_C | Low 'Solvent' Ueq as Compared to Neighbors of  | S1    | Check                   |      |        |

|                   |                                                  |        |        |
|-------------------|--------------------------------------------------|--------|--------|
| PLAT342_ALERT_3_C | Low Bond Precision on C-C Bonds .....            | 0.0129 | Ang.   |
| PLAT410_ALERT_2_C | Short Intra H...H Contact H46B .. H51B ..        | 1.93   | Ang.   |
| PLAT410_ALERT_2_C | Short Intra H...H Contact H48A .. H49B ..        | 1.92   | Ang.   |
| PLAT601_ALERT_2_C | Structure Contains Solvent Accessible VOIDS of . | 37     | Ang3   |
| PLAT906_ALERT_3_C | Large K value in the Analysis of Variance .....  | 2.391  | Check  |
| PLAT911_ALERT_3_C | Missing # FCF Refl Between THmin & STh/L= 0.595  | 688    | Report |
| PLAT918_ALERT_3_C | Reflection(s) with I(obs) much Smaller I(calc) . | 2      | Check  |
| PLAT971_ALERT_2_C | Check Calcd Residual Density 1.20A From O6       | 2.09   | eA-3   |
| PLAT971_ALERT_2_C | Check Calcd Residual Density 0.16A From S2       | 1.91   | eA-3   |
| PLAT971_ALERT_2_C | Check Calcd Residual Density 1.38A From C46      | 1.87   | eA-3   |
| PLAT971_ALERT_2_C | Check Calcd Residual Density 1.04A From O6       | 1.85   | eA-3   |
| PLAT971_ALERT_2_C | Check Calcd Residual Density 1.32A From C50      | 1.73   | eA-3   |
| PLAT971_ALERT_2_C | Check Calcd Residual Density 1.31A From C49      | 1.70   | eA-3   |
| PLAT971_ALERT_2_C | Check Calcd Residual Density 0.07A From C45      | 1.63   | eA-3   |
| PLAT972_ALERT_2_C | Check Calcd Residual Density 0.15A From O6       | -2.15  | eA-3   |
| PLAT976_ALERT_2_C | Check Calcd Residual Density 0.88A From O3       | -0.43  | eA-3   |
| PLAT977_ALERT_2_C | Check the Negative Difference Density on H48A    | -0.33  | eA-3   |
| PLAT978_ALERT_2_C | Number C-C Bonds with Positive Residual Density  | 0      | Note   |

---

### ● Alert level G

|                   |                                                  |       |        |
|-------------------|--------------------------------------------------|-------|--------|
| PLAT003_ALERT_2_G | Number of Uiso or Uij Restrained non-H Atoms ... | 16    | Report |
| PLAT072_ALERT_2_G | SHELXL First Parameter in WGHT Unusually Large   | 0.17  | Report |
| PLAT083_ALERT_2_G | SHELXL Second Parameter in WGHT Unusually Large  | 31.64 | Why ?  |
| PLAT171_ALERT_4_G | The CIF-Embedded .res File Contains EADP Records | 5     | Report |
| PLAT177_ALERT_4_G | The CIF-Embedded .res File Contains DELU Records | 1     | Report |
| PLAT178_ALERT_4_G | The CIF-Embedded .res File Contains SIMU Records | 3     | Report |
| PLAT187_ALERT_4_G | The CIF-Embedded .res File Contains RIGU Records | 6     | Report |
| PLAT199_ALERT_1_G | Reported _cell_measurement_temperature ..... (K) | 273   | Check  |
| PLAT200_ALERT_1_G | Reported _diffrn_ambient_temperature ..... (K)   | 273   | Check  |
| PLAT244_ALERT_4_G | Low 'Solvent' Ueq as Compared to Neighbors of    | C69   | Check  |
| PLAT244_ALERT_4_G | Low 'Solvent' Ueq as Compared to Neighbors of    | C70   | Check  |
| PLAT720_ALERT_4_G | Number of Unusual/Non-Standard Labels .....      | 7     | Note   |
| PLAT860_ALERT_3_G | Number of Least-Squares Restraints .....         | 34    | Note   |
| PLAT909_ALERT_3_G | Percentage of Observed Data at Theta(Max) Still  | 49    | %      |
| PLAT933_ALERT_2_G | Number of OMIT records in Embedded RES .....     | 18    | Note   |
| PLAT951_ALERT_5_G | Calculated (ThMax) and CIF-Reported Kmax Differ  | 2     | Units  |
| PLAT957_ALERT_1_G | Calculated (ThMax) and Actual (FCF) Kmax Differ  | 2     | Units  |

---

0 **ALERT level A** = Most likely a serious problem - resolve or explain  
3 **ALERT level B** = A potentially serious problem, consider carefully  
72 **ALERT level C** = Check. Ensure it is not caused by an omission or oversight  
17 **ALERT level G** = General information/check it is not something unexpected

3 ALERT type 1 CIF construction/syntax error, inconsistent or missing data  
50 ALERT type 2 Indicator that the structure model may be wrong or deficient  
9 ALERT type 3 Indicator that the structure quality may be low  
29 ALERT type 4 Improvement, methodology, query or suggestion  
1 ALERT type 5 Informative message, check

---

## Datablock: agada

---

Bond precision: C-C = 0.0024 A

Wavelength=0.77490

Cell: a=18.9803(7) b=18.6631(7) c=22.8795(8)  
alpha=90 beta=112.823(2) gamma=90  
Temperature: 150 K

|                | Calculated               | Reported                 |
|----------------|--------------------------|--------------------------|
| Volume         | 7470.1(5)                | 7470.1(5)                |
| Space group    | P 21/n                   | P 1 21/n 1               |
| Hall group     | -P 2yn                   | -P 2yn                   |
| Moiety formula | C40 H44 Ag N4, C F3 O3 S | C40 H44 Ag N4, C F3 O3 S |
| Sum formula    | C41 H44 Ag F3 N4 O3 S    | C41 H44 Ag F3 N4 O3 S    |
| Mr             | 837.73                   | 837.73                   |
| Dx,g cm-3      | 1.490                    | 1.490                    |
| Z              | 8                        | 8                        |
| Mu (mm-1)      | 0.814                    | 0.814                    |
| F000           | 3456.0                   | 3456.0                   |
| F000'          | 3457.17                  |                          |
| h,k,lmax       | 31,30,37                 | 31,30,37                 |
| Nref           | 34641                    | 34412                    |
| Tmin,Tmax      |                          | 0.619,0.745              |
| Tmin'          | 0.908                    |                          |

Correction method= # Reported T Limits: Tmin=0.619 Tmax=0.745  
AbsCorr = MULTI-SCAN

Data completeness= 0.993 Theta(max)= 39.507

R(reflections)= 0.0397( 27900) wR2(reflections)= 0.1113( 34412)

S = 1.021 Npar= 955

---

The following ALERTS were generated. Each ALERT has the format  
**test\_name\_ALERT\_alert-type\_alert-level**.  
Click on the hyperlinks for more details of the test.

---

**Alert level B**

|                   |                         |     |    |     |    |          |
|-------------------|-------------------------|-----|----|-----|----|----------|
| PLAT230_ALERT_2_B | Hirshfeld Test Diff for | C51 | -- | C52 | .. | 7.7 s.u. |
| PLAT230_ALERT_2_B | Hirshfeld Test Diff for | C52 | -- | C53 | .. | 7.1 s.u. |

---

**Alert level C**

|                   |                                                 |       |      |     |    |           |
|-------------------|-------------------------------------------------|-------|------|-----|----|-----------|
| PLAT230_ALERT_2_C | Hirshfeld Test Diff for                         | C51   | --   | C58 | .. | 6.2 s.u.  |
| PLAT230_ALERT_2_C | Hirshfeld Test Diff for                         | C51   | --   | C59 | .. | 6.1 s.u.  |
| PLAT230_ALERT_2_C | Hirshfeld Test Diff for                         | C55   | --   | C59 | .. | 6.3 s.u.  |
| PLAT230_ALERT_2_C | Hirshfeld Test Diff for                         | C56   | --   | C57 | .. | 5.3 s.u.  |
| PLAT230_ALERT_2_C | Hirshfeld Test Diff for                         | C71   | --   | C79 | .. | 5.4 s.u.  |
| PLAT230_ALERT_2_C | Hirshfeld Test Diff for                         | C72   | --   | C73 | .. | 5.7 s.u.  |
| PLAT230_ALERT_2_C | Hirshfeld Test Diff for                         | C77   | --   | C78 | .. | 6.7 s.u.  |
| PLAT244_ALERT_4_C | Low 'Solvent' Ueq as Compared to Neighbors of   |       |      |     |    | S2 Check  |
| PLAT910_ALERT_3_C | Missing # of FCF Reflection(s) Below Theta(Min) |       |      |     |    | 5 Note    |
| PLAT911_ALERT_3_C | Missing # FCF Refl Between THmin & STh/L=       | 0.600 |      |     |    | 56 Report |
| PLAT971_ALERT_2_C | Check Calcd Residual Density                    | 1.41A | From | C52 |    | 1.89 eA-3 |

|                   |                                                 |            |     |           |
|-------------------|-------------------------------------------------|------------|-----|-----------|
| PLAT971_ALERT_2_C | Check Calcd Residual Density                    | 1.33A From | C59 | 1.72 eA-3 |
| PLAT971_ALERT_2_C | Check Calcd Residual Density                    | 1.30A From | C58 | 1.61 eA-3 |
| PLAT978_ALERT_2_C | Number C-C Bonds with Positive Residual Density |            |     | 0 Note    |

---

**Alert level G**

ABSMU01\_ALERT\_1\_G Calculation of \_exptl\_absorpt\_correction\_mu  
not performed for this radiation type.

|                   |                                                  |  |  |             |
|-------------------|--------------------------------------------------|--|--|-------------|
| PLAT003_ALERT_2_G | Number of Uiso or Uij Restrained non-H Atoms ... |  |  | 3 Report    |
| PLAT083_ALERT_2_G | SHELXL Second Parameter in WGHT Unusually Large  |  |  | 5.32 Why ?  |
| PLAT177_ALERT_4_G | The CIF-Embedded .res File Contains DELU Records |  |  | 2 Report    |
| PLAT178_ALERT_4_G | The CIF-Embedded .res File Contains SIMU Records |  |  | 2 Report    |
| PLAT187_ALERT_4_G | The CIF-Embedded .res File Contains RIGU Records |  |  | 1 Report    |
| PLAT232_ALERT_2_G | Hirshfeld Test Diff (M-X) Ag1 -- N1 ..           |  |  | 5.0 s.u.    |
| PLAT232_ALERT_2_G | Hirshfeld Test Diff (M-X) Ag1 -- N3 ..           |  |  | 5.8 s.u.    |
| PLAT232_ALERT_2_G | Hirshfeld Test Diff (M-X) Ag2 -- N5 ..           |  |  | 5.8 s.u.    |
| PLAT232_ALERT_2_G | Hirshfeld Test Diff (M-X) Ag2 -- N8 ..           |  |  | 5.3 s.u.    |
| PLAT244_ALERT_4_G | Low 'Solvent' Ueq as Compared to Neighbors of    |  |  | C81 Check   |
| PLAT244_ALERT_4_G | Low 'Solvent' Ueq as Compared to Neighbors of    |  |  | C82 Check   |
| PLAT860_ALERT_3_G | Number of Least-Squares Restraints .....         |  |  | 23 Note     |
| PLAT912_ALERT_4_G | Missing # of FCF Reflections Above STh/L= 0.600  |  |  | 170 Note    |
| PLAT913_ALERT_3_G | Missing # of Very Strong Reflections in FCF .... |  |  | 2 Note      |
| PLAT933_ALERT_2_G | Number of OMIT records in Embedded RES .....     |  |  | 57 Note     |
| PLAT984_ALERT_1_G | The H-f'= 0.000 Deviates from the B&C-Value      |  |  | 0.011 Check |

---

0 **ALERT level A** = Most likely a serious problem - resolve or explain  
2 **ALERT level B** = A potentially serious problem, consider carefully  
14 **ALERT level C** = Check. Ensure it is not caused by an omission or oversight  
17 **ALERT level G** = General information/check it is not something unexpected

2 ALERT type 1 CIF construction/syntax error, inconsistent or missing data  
20 ALERT type 2 Indicator that the structure model may be wrong or deficient  
4 ALERT type 3 Indicator that the structure quality may be low  
7 ALERT type 4 Improvement, methodology, query or suggestion  
0 ALERT type 5 Informative message, check

---

It is advisable to attempt to resolve as many as possible of the alerts in all categories. Often the minor alerts point to easily fixed oversights, errors and omissions in your CIF or refinement strategy, so attention to these fine details can be worthwhile. In order to resolve some of the more serious problems it may be necessary to carry out additional measurements or structure refinements. However, the purpose of your study may justify the reported deviations and the more serious of these should normally be commented upon in the discussion or experimental section of a paper or in the "special\_details" fields of the CIF. checkCIF was carefully designed to identify outliers and unusual parameters, but every test has its limitations and alerts that are not important in a particular case may appear. Conversely, the absence of alerts does not guarantee there are no aspects of the results needing attention. It is up to the individual to critically assess their own results and, if necessary, seek expert advice.

### **Publication of your CIF in IUCr journals**

A basic structural check has been run on your CIF. These basic checks will be run on all CIFs submitted for publication in IUCr journals (*Acta Crystallographica*, *Journal of Applied Crystallography*, *Journal of Synchrotron Radiation*); however, if you intend to submit to *Acta Crystallographica Section C* or *E* or *IUCrData*, you should make sure that full publication checks are run on the final version of your CIF prior to submission.

### **Publication of your CIF in other journals**

Please refer to the *Notes for Authors* of the relevant journal for any special instructions relating to CIF submission.

---

**PLATON version of 11/08/2016; check.def file version of 04/08/2016**

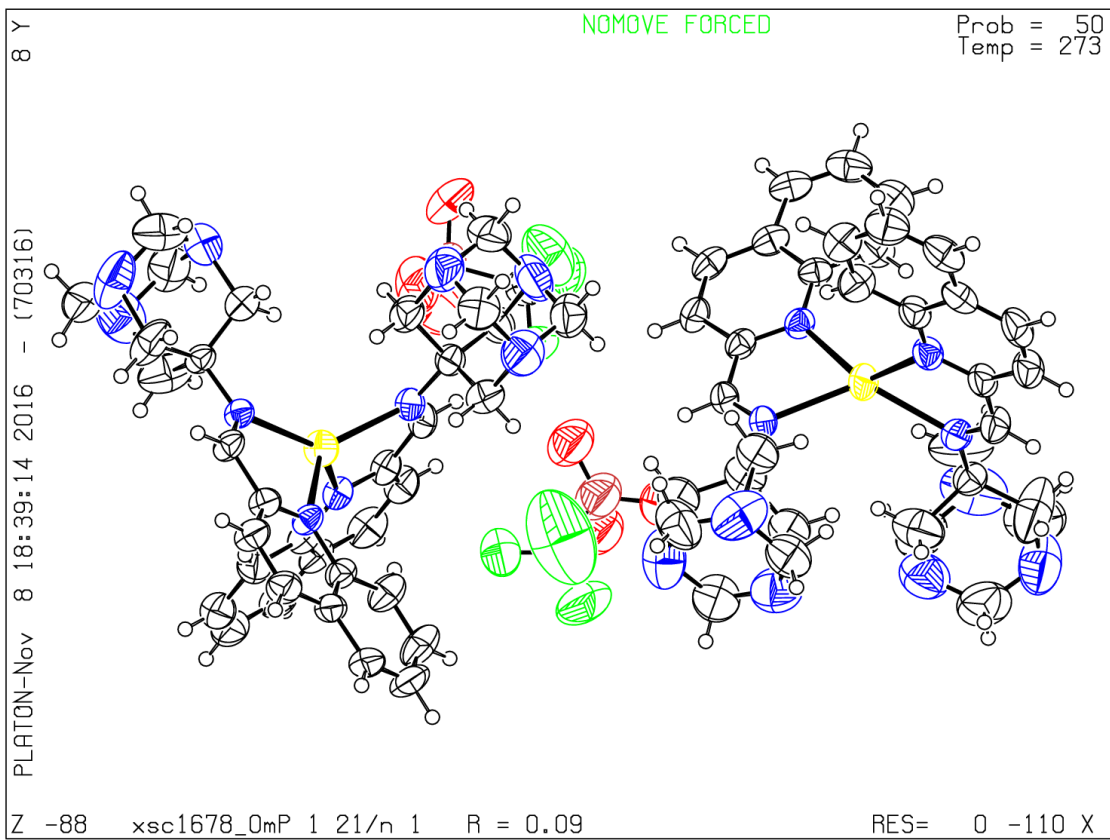

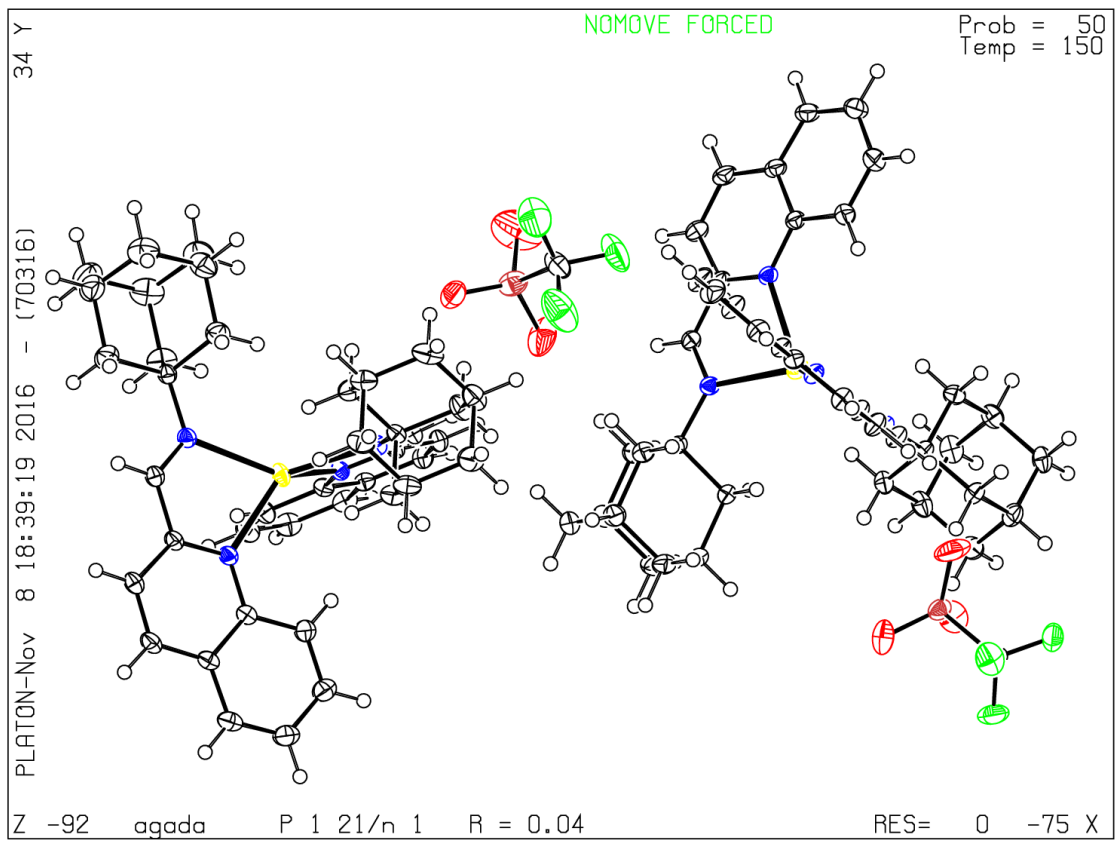

Supplement: NIHMS925545-supplement-supplemental.pdf [file NIHMS925545-supplement-supplemental.pdf]
